# Supplementary material for: What information do parents need when facing end-of-life decisions for their child? A meta-synthesis of parental feedback
Source: Springer Nature journal article supplement (doi:10.1186/s12904-015-0024-0), 2015-04-29
Supplement: MOESM1 [file 9754488]

Table S1. Studies included in meta-synthesis

|   | <b>Study</b>                                                                                                                                                                                                                                                       | <b>Design</b>                                                                                                                                                                                                                                                                          | <b>Key focus</b>                                                                                                                                                                         | <b>Participants</b>                                                                                                                 | <b>Country</b> | <b>Patient group</b> |
|---|--------------------------------------------------------------------------------------------------------------------------------------------------------------------------------------------------------------------------------------------------------------------|----------------------------------------------------------------------------------------------------------------------------------------------------------------------------------------------------------------------------------------------------------------------------------------|------------------------------------------------------------------------------------------------------------------------------------------------------------------------------------------|-------------------------------------------------------------------------------------------------------------------------------------|----------------|----------------------|
| 1 | Branchett, K. and J. Stretton (2012). "Neonatal palliative and end of life care: What parents want from professionals."                                                                                                                                            | Inductive study utilizing an internet parental support forum. Thematic analysis.                                                                                                                                                                                                       | Parents' experiences in neonatal palliative care and lessons to be learnt                                                                                                                | 54 mothers and 3 fathers who had lost a child in the neonatal period                                                                | UK             | neonates             |
| 2 | Hellmann, J., C. Williams, et al. (2012). "Withdrawal of artificial nutrition and hydration in the Neonatal Intensive Care Unit: Parental perspectives."                                                                                                           | Retrospective chart review and parental survey including open-ended comments. Analysed using simple statistics and theme generation for qualitative data.                                                                                                                              | Parental perspectives on withdrawal of artificial nutrition and hydration in NICU                                                                                                        | 11 sets of parents whose babies died after withdrawal of hydration & nutrition                                                      | Canada         | neonates             |
| 3 | Pepper, D., G. Rempel, et al. (2012). "More Than Information: A Qualitative Study of Parents' Perspectives on Neonatal Intensive Care at the Extremes of Prematurity."                                                                                             | Interpretive descriptive study, semi-structured interviews. Major themes identified, commonalities explored, and interrelationship among themes investigated and described.                                                                                                            | Parental perceptions of decision making concerning their extremely premature newborns                                                                                                    | 7 parents of preterm infants who were born at 24-26 weeks' gestation                                                                | Canada         | neonates             |
| 4 | Roscigno, C. I., T. A. Savage, et al. (2012). "Divergent views of hope influencing communications between parents and hospital providers." Qualitative Health Research 22(9): 1232-1246.                                                                           | Semi-structured interviews before and after delivery. 4 interview types (prenatal, postnatal, stillbirth, and end of life). Code-based descriptive case summary used for construction of matrices for each type of interview, allowing for comparison of data within and across cases. | Evaluation of the varying notions of hope between parents who were at risk of a periviable delivery and their healthcare providers                                                       | 40 mothers with possible preterm delivery before 26 weeks, 14 of their partners, and 71 doctors, neonatal nurses, and staff nurses. | USA            | neonates             |
| 5 | Shaw, A. (2012). "'They Say Islam Has A Solution For Everything, So Why Are There No Guidelines For This?' Ethical Dilemmas Associated With The Births And Deaths Of Infants With Fatal Abnormalities From A Small Sample Of Pakistani Muslim Couples In Britain." | 3 case studies taken from qualitative research involving 66 families                                                                                                                                                                                                                   | Case studies of Muslim parents' ethical dilemmas concerning the termination of pregnancy, the management of childbirth, and the withdrawal of life-support from infants in special care. | 3 couples                                                                                                                           | UK             | fetus /neonate       |
| 6 | Tan, J. S., S. L. Docherty, et al. (2012). "Addressing parental bereavement support needs at the end of life for infants with complex chronic conditions."                                                                                                         | Longitudinal, qualitative, descriptive design. Extreme case sampling used to select 7 cases. Content analysis.                                                                                                                                                                         | The bereavement experience of parents whose infants die in acute care settings with a complex chronic condition                                                                          | 14 parents of 8 infants                                                                                                             | USA            | infants              |
| 7 | Black, B. P. (2011). "Truth telling and severe fetal diagnosis: A virtue ethics perspective."                                                                                                                                                                      | Longitudinal ethnography examining parents' experiences across 3 available care options: termination, routine obstetric care, and perinatal end-of-life care. Content analysis. Data matrices constructed for data comparison.                                                         | How parents create meaning and truth in the context of the prenatal diagnosis of severe impairment                                                                                       | 15 women and 10 male partners with a severe fetal diagnosis (3 lots of interviews conducted with each)                              | USA            | fetus/<br>neonates   |

|    | <b>Study</b>                                                                                                                                                                    | <b>Design</b>                                                                                                                                                                                                                                                                                                                                                              | <b>Key focus</b>                                                                                                                                                                                                                                                                    | <b>Participants</b>                                                                                                                    | <b>Country</b> | <b>Patient group</b>    |
|----|---------------------------------------------------------------------------------------------------------------------------------------------------------------------------------|----------------------------------------------------------------------------------------------------------------------------------------------------------------------------------------------------------------------------------------------------------------------------------------------------------------------------------------------------------------------------|-------------------------------------------------------------------------------------------------------------------------------------------------------------------------------------------------------------------------------------------------------------------------------------|----------------------------------------------------------------------------------------------------------------------------------------|----------------|-------------------------|
| 8  | Caeymaex, L., M. Speranza, et al. (2011). "Living with a crucial decision: A qualitative study of parental narratives three years after the loss of their newborn in the NICU." | Retrospective longitudinal design. Face-to-face & telephone interviews. Discourse analysis.                                                                                                                                                                                                                                                                                | Parents' experience of the end-of-life decision-making process                                                                                                                                                                                                                      | 53 face-to-face interviews and 80 telephone interviews conducted with 164 individuals 3 years after the death of their child           | France         | neonates                |
| 9  | Côté-Arsenault, D. and E. Denney-Koelsch (2011). ""My baby is a person": Parents' experiences with life-threatening fetal diagnosis."                                           | Qualitative descriptive study using open ended questions. Thematic analysis.                                                                                                                                                                                                                                                                                               | Parents' experience of pregnancy with a life-threatening diagnosis to understand their needs for perinatal palliative care services, and establish the feasibility and acceptability of conducting intensive interviews of pregnant women and their partners during their pregnancy | 2 women and 3 couples during pregnancy or just after birth                                                                             | USA            | fetus/<br>neonates      |
| 10 | Hexem, K. R., C. J. Mollen, et al. (2011). "How parents of children receiving pediatric palliative care use religion, spirituality, or life philosophy in tough times."         | Prospective cohort study on parental decision-making for children receiving pediatric palliative care-interviews. Grounded theory.                                                                                                                                                                                                                                         | Enquiry into how religion, spirituality, or life philosophy (RSLP) was helpful to parents in difficult times (including decision-making)                                                                                                                                            | 73 parents                                                                                                                             | USA            | children<br>(aged 1-24) |
| 11 | Knapp, C., V. Madden, et al. (2011). "Information seeking behaviors of parents whose children have life-threatening illnesses."                                                 | Cross-sectional, telephone survey. Statistical analyses.                                                                                                                                                                                                                                                                                                                   | Associations between parental characteristics and preferred health information sources & parents' e-health literacy                                                                                                                                                                 | 129 parents with children in a pediatric palliative care program                                                                       | USA            | children                |
| 12 | Michelson, K. N., L. Emanuel, et al. (2011). "Pediatric intensive care unit family conferences: One mode of communication for discussing end-of-life care decisions."           | Retrospective qualitative study. In-depth, semi-structured focus groups and interviews. Thematic analysis.                                                                                                                                                                                                                                                                 | Pediatric palliative care conferences & family conferences (FC) for discussions about end-of-life decision-making.                                                                                                                                                                  | 18 parents of children who died in the pediatric intensive care unit and 48 pediatric intensive care unit professionals                | USA            | children                |
| 13 | Moro, T. T., K. Kavanaugh, et al. (2011). "Parent decision making for life support for extremely premature infants: From the prenatal through end-of-life period."              | Five cases with prenatal, postnatal and end-of-life interviews, and medical record data extraction. Data were coded based on the Ottawa Decision Support Framework. Summaries and matrices were generated for prenatal, postnatal and end-of life interviews. Comparison of data within and across cases and groups, i.e. parents, nurses, and physicians, were conducted. | How parents make life support decisions from the prenatal period through death.                                                                                                                                                                                                     | 5 cases comprising 5 mothers, 4 neonatologists, 3 nurses, and 1 neonatal nurse practitioner, drawn from a larger collective case study | USA            | neonates                |
| 14 | Thiele, P. (2011). "Going against the grain: Liam's story."                                                                                                                     | Case study, self-reported by mother                                                                                                                                                                                                                                                                                                                                        | The experience of one mother losing her baby                                                                                                                                                                                                                                        | 1 mother                                                                                                                               | Aus            | neonates                |

|    | <b>Study</b>                                                                                                                                                                                             | <b>Design</b>                                                                                                                                                                                              | <b>Key focus</b>                                                                                                                                                                                                                                           | <b>Participants</b>                                                                                                                     | <b>Country</b> | <b>Patient group</b>                           |
|----|----------------------------------------------------------------------------------------------------------------------------------------------------------------------------------------------------------|------------------------------------------------------------------------------------------------------------------------------------------------------------------------------------------------------------|------------------------------------------------------------------------------------------------------------------------------------------------------------------------------------------------------------------------------------------------------------|-----------------------------------------------------------------------------------------------------------------------------------------|----------------|------------------------------------------------|
| 15 | Davies, B., N. Contro, et al. (2010). "Culturally-sensitive information-sharing in pediatric palliative care."                                                                                           | Retrospective design of grounded theory analysis. Questionnaire with 21 questions, (summated Likert-type scale and descriptive response)                                                                   | Chinese and Mexican American parents' perspectives on communication with health care providers in palliative care                                                                                                                                          | 36 parents (26 Mexican American and 10 Chinese American) from 28 families who experienced death of child (<20 years)                    | USA            | children<20 years in pediatric palliative care |
| 16 | Einaudi, M. A., Le Coz P. et al. (2010). "Parental experience following perinatal death: Exploring the issues to make progress."                                                                         | Qualitative descriptive survey - questionnaire based on the Delphi method, semi-directed interviews and written survey. Secondary analysis of ethical principles encountered by participants.              | To understand parental attitudes, needs and ethical issues associated with perinatal death, to assist in the development of interventions for bereaved families                                                                                            | 10 mothers and 2 fathers (3 interviews with mothers, rest mail responses)                                                               | France         | neonates                                       |
| 17 | Kavanaugh, K., T. T. Moro, et al. (2010). "How nurses assist parents regarding life support decisions for extremely premature infants."                                                                  | Qualitative, longitudinal, collective case study – semi-structured interviews pre- and postnatally and extraction of medical chart data.                                                                   | Nurse behaviours that assist parents make decisions about very premature babies                                                                                                                                                                            | 40 cases (40 mothers, 14 fathers, 42 physicians, 17 obstetric nurses, 6 neonatal nurses, and 6 neonatal nurse practitioners).           | USA            | neonates                                       |
| 18 | Einarsdóttir, J. (2009). "Emotional experts: Parents' views on end-of-life decisions for preterm infants in Iceland."                                                                                    | Qualitative research using open ended and semi-structured interviews.                                                                                                                                      | Parents' perceptions about whether and when treatment should be withdrawn and who should decide                                                                                                                                                            | 28 mothers and 25 fathers                                                                                                               | Iceland        | neonates                                       |
| 19 | Michelson, K. N., T. Koogler, et al. (2009). "Parental views on withdrawing life-sustaining therapies in critically ill children."                                                                       | Quantitative and qualitative analysis of semi-structured one-on-one interviews.                                                                                                                            | Parental willingness to consider withdrawing life-sustaining therapies and the influences of quality of life, physician estimated prognosis, patient suffering, and financial burden on such decisions.                                                    | 70 parents                                                                                                                              | USA            | children                                       |
| 20 | Williams, C., J. Cairnie, et al. (2009). "Construction of a parent-derived questionnaire to measure end-of-life care after withdrawal of life-sustaining treatment in the neonatal intensive care unit." | Semi-structured interviews used to develop a survey instrument for social workers.                                                                                                                         | Parents whose infants had undergone withdrawal of life-sustaining treatment in the NICU were interviewed to obtain their views on helpful practices to build an instrument to measure important aspects of Withdrawal of Life Support Treatment practices. | 11 parents whose infants had undergone withdrawal of life-sustaining treatment in the NICU<br>48 social workers completed questionnaire | Canada         | neonates                                       |
| 21 | Arockiasamy V, Holsti L, and Albersheim S, (2008) "Fathers' experiences in the neonatal intensive care unit: A search for control."                                                                      | Semi-structured interviews with open-ended questions. Coded using the constant comparative method of content analysis.                                                                                     | Level of comfort with or concerns about staff communication regarding their infant, about accessing information, and about more general perceptions of their experience in the NICU.                                                                       | 16 fathers of very ill and/or very preterm infants who had been in the NICU for 30 days                                                 | Canada         | neonates                                       |
| 22 | Boss, R. D., N. Hutton, et al. (2008). "Values parents apply to decision-making regarding delivery room resuscitation for high-risk newborns."                                                           | Qualitative multi-center study. Parents interviewed about their prenatal decision-making. Maternal medical charts reviewed for documented discussions about delivery room resuscitation. Content analysis. | Values guiding parental decision-making regarding delivery room resuscitation for infants born extremely prematurely or with potentially lethal congenital anomalies.                                                                                      | 26 mothers                                                                                                                              | USA            | neonates                                       |

|    | <b>Study</b>                                                                                                                                                              | <b>Design</b>                                                                                                                                                                                             | <b>Key focus</b>                                                                                                                                                        | <b>Participants</b>                                                                                      | <b>Country</b>  | <b>Patient group</b>           |
|----|---------------------------------------------------------------------------------------------------------------------------------------------------------------------------|-----------------------------------------------------------------------------------------------------------------------------------------------------------------------------------------------------------|-------------------------------------------------------------------------------------------------------------------------------------------------------------------------|----------------------------------------------------------------------------------------------------------|-----------------|--------------------------------|
| 23 | Meert, K. L., S. Eggly, et al. (2008). "Parents' perspectives on physician-parent communication near the time of a child's death in the pediatric intensive care unit."   | Secondary analysis of a qualitative interview study. Detailed notes of parent interviews compared and used for identification of themes.                                                                  | Positive and negative ways of communicating bad information to parents regarding their child's terminal illness and death                                               | 56 parents of 48 children who died in the PICU 3-12 months prior to study.                               | USA             | children                       |
| 24 | Widger, K. and C. Picot (2008). "Parents' perceptions of the quality of pediatric and perinatal end-of-life care."                                                        | Face-to-face or telephone interviews with specially developed survey. Frequencies of responses to questions were determined and problem areas identified. Responses to open-ended questions summarized.   | Quality of care provided (including communication of information) around the death of the child (12-24 months prior to study commencement)                              | 38 families (primarily mothers)                                                                          | Canada          | infants, children, adolescents |
| 25 | Armentrout, D. C. (2007). "Holding a Place: Parents' Lives Following Removal of Infant Life Support."                                                                     | Grounded theory study. Face-to-face and telephone interviews.                                                                                                                                             | Parental decision-making to discontinue life support and identification of the process that allows them to then move forward with their lives after the infant's death. | 15 parents (4 couples and 7 mothers) drawn from support group for parents who experienced neonatal death | USA             | neonates                       |
| 26 | Brosig, C. L., R. L. Pierucci, et al. (2007). "Infant end-of-life care: The parents' perspective."                                                                        | Revised Grief Experience Inventory (RGEI) completed by parents and a semi-structured interviews regarding their infants' end-of-life care. Interviews rated using the Post-Death Adaptation Scale (PDAS). | Factors important to parents in their infant's end-of-life care.                                                                                                        | 19 families whose infant (less than 1 year old) had died                                                 | USA             | neonates/ infants              |
| 27 | Carnevale, F. A., P. Canoui, et al. (2007). "Parental involvement in treatment decisions regarding their critically ill child: A comparative study of France and Quebec." | Grounded theory qualitative methodology. Semi-structured interviews were conducted. (Comparison between French and Quebec cohorts)                                                                        | To determine who assumes decision-making responsibility for treatment decisions and how this relates to subsequent parental experience.                                 | 31 parents of critically ill children; 9 physicians & 13 nurses who cared for their children             | France & Canada | children                       |
| 28 | Konrad, S. C. (2007). "What parents of seriously ill children value: Parent-to-parent connection and mentorship."                                                         | Psychological phenomenological design with open-ended interviews. Ongoing and comparative method of thematic analysis.                                                                                    | Parent-to-parent mentorship for parents of seriously ill or dying children                                                                                              | 12 mothers of seriously ill children, including those whose children had died                            | USA             | children (birth-age 15)        |
| 29 | Rini, A. and L. Loriz (2007). "Anticipatory Mourning in Parents With a Child Who Dies While Hospitalized."                                                                | An exploratory design used to answer questions in focused semi-structured interviews. Thematic analysis(?)                                                                                                | Parents' descriptions of their experiences surrounding the death of their child and the role of anticipatory mourning                                                   | 11 parents whose child died during hospitalisation                                                       | USA             | children (birth-age 12)        |
| 30 | Alderson, P., J. Hawthorne, et al. (2006). "Parents' experiences of sharing neonatal information and decisions: Consent, cost and risk."                                  | Ethnographic research. Semi-structured taped interviews. Thematic analysis (?)                                                                                                                            | Parents' experiences of sharing information and decisions with neonatal staff                                                                                           | parents of 80 babies with definite or potential neuro-developmental problems and 40 senior practitioners | UK              | neonates                       |
| 31 | Berg, S. (2006). "In their own voices: families discuss end-of-life decision making--part 2."                                                                             | Personal narrative                                                                                                                                                                                        | A mother's interactions with healthcare providers when faced with difficult decision-making about her toddler.                                                          | 1 mother                                                                                                 | USA             | toddler                        |

|    | <b>Study</b>                                                                                                                                                                   | <b>Design</b>                                                                                                                                                                                                     | <b>Key focus</b>                                                                                                                                                                                                                                                                                                          | <b>Participants</b>                                                                                                                   | <b>Country</b>                                                                    | <b>Patient group</b>              |
|----|--------------------------------------------------------------------------------------------------------------------------------------------------------------------------------|-------------------------------------------------------------------------------------------------------------------------------------------------------------------------------------------------------------------|---------------------------------------------------------------------------------------------------------------------------------------------------------------------------------------------------------------------------------------------------------------------------------------------------------------------------|---------------------------------------------------------------------------------------------------------------------------------------|-----------------------------------------------------------------------------------|-----------------------------------|
| 32 | Dokken, D. L. (2006). "In their own voices: families discuss end-of-life decision making--part 1. Interview by Elizabeth Ahmann."                                              | Personal narrative                                                                                                                                                                                                | The story of a mother's interactions with health care providers when faced with end-of-life decision making for her baby                                                                                                                                                                                                  | 1 mother                                                                                                                              | USA                                                                               | neonate                           |
| 33 | Kowalski, W. J., K. H. Leef, et al. (2006) Communicating with parents of premature infants: who is the informant?                                                              | A 19-item questionnaire comprising multiple choice questions, yes/no questions, 5-point Likert scale questions, and open-ended questions. Statistical analysis.                                                   | Examines sources of information, who provides it, and parents' expectations regarding obtaining information in NICU                                                                                                                                                                                                       | 101 parents of infants 32 weeks or younger prior to discharge from the NICU                                                           | USA                                                                               | neonates                          |
| 34 | Meyer, E. C., M. D. Ritholz, et al. (2006). "Improving the quality of end-of-life care in the pediatric intensive care unit: Parents' priorities and recommendations."         | Qualitative study based on parental responses to open-ended questions on anonymous, self-administered questionnaires. Content analysis.                                                                           | Identification and description of priorities and recommendations for end-of-life care and communication from the parents' perspective.                                                                                                                                                                                    | 56 parents                                                                                                                            | USA                                                                               | neonates-18 years of age who died |
| 35 | Payot, A., S. Gendron, et al. (2006). "Deciding to resuscitate extremely premature babies: How do parents and neonatologists engage in the decision?"                          | Interpretive qualitative method (informed by Guba and Lincoln's hermeneutic and dialectical approach). In-depth semi-directed interviews immediately following neonatal consultation.                             | How parents and neonatologists engage in decision-making in a context of imminent and unplanned delivery at the threshold of viability                                                                                                                                                                                    | 8 couples & 4 neonatologists                                                                                                          | Canada                                                                            | fetus /neonates                   |
| 36 | Kavanaugh, K., T. Savage, et al. (2005). "Life support decisions for extremely premature infants: Report of a pilot study."                                                    | Qualitative collective case study –pilot (one prenatal, one postnatal, and one post death). Ottawa framework used for data analysis. Data were compared within and across each case.                              | Decision making and the decision support needs of parents, physicians, and nurses regarding life support decisions made prenatally and postnatally for very premature infants                                                                                                                                             | 6 cases (6 mothers, 2 fathers, 6 physicians, and 2 nurses)                                                                            | USA                                                                               | neonates (premature)              |
| 37 | Keenan, H. T., M. W. Doron, et al. (2005). "Comparison of Mothers' and Counselors' Perceptions of Predelivery Counseling for Extremely Premature Infants."                     | Descriptive study. Mothers interviewed by telephone using a standardized interview format developed for this study and their counsellors. Thematic analysis (?)                                                   | Mothers' and Counselors' perceptions of their roles in decision-making regarding resuscitation and mothers' and counselors' satisfaction with the counseling and decision-making process.                                                                                                                                 | 33 mothers and their counselors                                                                                                       | USA                                                                               | neonates (premature)              |
| 38 | Partridge, J. C., A. M. Martinez, et al. (2005). "International comparison of care for very low birth weight infants: Parents' perceptions of counseling and decision-making." | Quantitative study using interview tool developed for this study. Half-hour structured interviews. Derived descriptive statistics (frequencies) and subgroup comparisons from survey responses.                   | Comparison of parental perceptions and satisfaction with antenatal counseling and delivery room resuscitation (factors taken into consideration in decisions, and acceptance of parental decision-making) in 6 Pacific Rim countries and 2 Californian hospitals. Sample comprised mostly parents whose infants survived. | Parents interviewed at each site: Taiwan 45, Hong Kong 42, Singapore 56, Kuala Lumpur 37, Tokyo 31, Melbourne 51, San Francisco 65    | Australia, Hong Kong, Japan, Malaysia, Taiwan, Singapore 2 sites in San Francisco | neonates (premature)              |
| 39 | Sharman, M., K. L. Meert, et al. (2005). "What influences parents' decisions to limit or withdraw life support?"                                                               | Prospective, qualitative pilot study. In-depth, semi-structured interviews. Qualitative data examined to identify factors important to parents during their decision-making process. Coding dictionary developed. | Factors influencing parents in their decision to forego life support for their children.                                                                                                                                                                                                                                  | 14 parents of ten children whose pediatric intensive care unit physician had made a recommendation to limit or withdraw life support. | USA                                                                               | children                          |

|    | Study                                                                                                                                                                                    | Design                                                                                                                                                                                                           | Key focus                                                                                                                                                                      | Participants                                                                                                                            | Country                                | Patient group                            |
|----|------------------------------------------------------------------------------------------------------------------------------------------------------------------------------------------|------------------------------------------------------------------------------------------------------------------------------------------------------------------------------------------------------------------|--------------------------------------------------------------------------------------------------------------------------------------------------------------------------------|-----------------------------------------------------------------------------------------------------------------------------------------|----------------------------------------|------------------------------------------|
| 40 | Orfali, K. and E. J. Gordon (2004). "Autonomy gone awry: A cross-cultural study of parents' experiences in neonatal intensive care units."                                               | Comparative ethnographic approach. In-depth, semi-structured interviews.                                                                                                                                         | Parental decision-making to discontinue life support in France (Units A & C) and US (Unit B)                                                                                   | 75 mothers of critically ill or deceased babies                                                                                         | France & USA                           | neonates                                 |
| 41 | Pector, E. A. (2004). "Views of bereaved multiple-birth parents on life support decisions, the dying process, and discussions surrounding death."                                        | Grounded theory approach used for qualitative data - a narrative e-mail survey assessing many facets of bereavement                                                                                              | Experiences of bereaved parents of multiples with resuscitation and life-support discussions, the death process, and conversations with health-care professionals about death. | 71 bereaved parents of multiples recruited from Internet support groups (4 of whom were fathers)                                        | North America                          | fetuses/ neonates                        |
| 42 | Dhillon A S, Albersheim S G, Alsaad S, Pargass N S, and Zupancic J A F, (2003) "Internet use and perceptions of information reliability by parents in a neonatal intensive care unit."   | Interviews utilising standardised questionnaire. Statistical analyses including logistic regression analyses                                                                                                     | To assess internet use and perceptions of information reliability by parents in a neonatal intensive care unit.                                                                | 90 parents of the babies admitted to the NICU                                                                                           | Canada                                 | neonates                                 |
| 43 | Lundqvist, A., T. Nilstun, et al. (2003). "Neonatal end-of-life care in Sweden: the views of Muslim women."                                                                              | Interviews using a standardized questionnaire with open-ended questions about care before birth, directly after birth, and during and after the death of the infant. Content analysis was performed on the data. | Muslim women's views on neonatal end-of-life in Sweden                                                                                                                         | 11 women (including 1 couple) (women from Iran, Iraq, Somalia, Turkey) experience with fetal impairment or neonatal death not necessary | Sweden                                 | hypothetical scenario involving neonates |
| 44 | Bialoskurski M M, Cox C L, and Wiggins R D, "The relationship between maternal needs and priorities in a neonatal intensive care environment."                                           | The theoretical framework for the study was based on symbolic interactionism Quantitative survey. Analysed with multivariate analysis                                                                            | To investigate the nature and organization of maternal needs and priorities in a neonatal unit.                                                                                | 209 mothers with premature infants.                                                                                                     | UK                                     | neonates                                 |
| 45 | Brinchmann, S. B., R. Førde, et al. (2002). "What Matters to the Parents? a qualitative study of parents' experiences with life-and-death decisions concerning their premature infants." | Descriptive study design using in-depth interviews. The comparative method (grounded theory) was used to analyse the data.                                                                                       | Parents' participation in life-and-death decisions concerning their very premature and/or critically ill infants in hospital neonatal units                                    | 35 parents of 26 children (Ten of the infants died; 16 were alive at the time of the interview.)                                        | Norway                                 | neonates                                 |
| 46 | Contro, N., J. Larson, et al. (2002). "Family perspectives on the quality of pediatric palliative care."                                                                                 | Qualitative needs assessment undertaken to inform the development of a Pediatric Palliative Care Program                                                                                                         | Experiences and their suggestions for improving the quality of end-of-life care were elicited from parents with involvement in end-of-life care                                | 68 family members of 44 deceased children (English and Spanish speaking)                                                                | USA                                    | children                                 |
| 47 | Davies, B. and S. Connaughty (2002). "Pediatric End-of-life Care: Lessons Learned From Parents."                                                                                         | The parental questionnaire consisted of 21 questions, most requiring both a response to a summated Likert-type scale and a descriptive response. Design not described.                                           | Parental insights into the meaning of optimal care for dying children                                                                                                          | 45 parents of children who died during a 2-year period                                                                                  | USA (and possibly Canada- unspecified) | children                                 |

|    | <b>Study</b>                                                                                                                              | <b>Design</b>                                                                                                                                                                                                                 | <b>Key focus</b>                                                                                                                                                                        | <b>Participants</b>                                                                                                                                          | <b>Country</b> | <b>Patient group</b>  |
|----|-------------------------------------------------------------------------------------------------------------------------------------------|-------------------------------------------------------------------------------------------------------------------------------------------------------------------------------------------------------------------------------|-----------------------------------------------------------------------------------------------------------------------------------------------------------------------------------------|--------------------------------------------------------------------------------------------------------------------------------------------------------------|----------------|-----------------------|
| 48 | Meyer, E. C., J. P. Burns, et al. (2002). "Parental perspectives on end-of-life care in the pediatric intensive care unit."               | Self-administered questionnaire with 28 Likert format questions and five open-ended questions. Statistical analysis. Analysis of the open-ended, qualitative questions not done for this paper but some quotes in Discussion. | Parental perspectives on priorities for quality end-of-life care                                                                                                                        | 56 mother and fathers (36 mothers, 20 fathers) of children who had died after withdrawal of treatment                                                        | USA            | children              |
| 49 | Brazy, J. E., B. M. Anderson, et al. (2001). "How parents of premature infants gather information and obtain support."                    | Descriptive cross-sectional study (in-depth structured interviews followed by detailed questionnaire designed to validate initial impressions and quantify responses). Data grouped into categories based on questions.       | Process by which parents of premature infants seek information, the kinds of information they seek, and the resources they use to meet their educational and support needs              | 19 parents of premature infants interviewed and questionnaires with 64 parents who had previously given birth to premature babies who were discharged alive  | USA            | neonates              |
| 50 | McHaffie, H. E., A. J. Lyon, et al. (2001). "Deciding on treatment limitation for neonates: The parents' perspective."                    | In-depth face-to-face semi-structured interviews. Method of analysis not described in detail.                                                                                                                                 | Parents' perceptions of withdrawal/withholding treatment                                                                                                                                | Interviews with 108 parents at 3 months after the death of the baby and then 90 parents at 13 months after the death of the baby                             | Scotland       | neonates              |
| 51 | Wocial, L. D. (2000). "Life support decisions involving imperiled infants."                                                               | Descriptive, qualitative study with open-ended telephone and face-to-face interviews. Content analysis.                                                                                                                       | Parents' perception of their experiences in the neonatal intensive care unit (NICU) when faced with the dilemma of withholding and/or withdrawing treatment from their infants.         | 20 parents whose babies received treatment in a neonatal intensive care unit and died                                                                        | USA            | neonates              |
| 52 | Kavanaugh, K. (1997). "Parents' experience surrounding the death of a newborn whose birth is at the margin of viability."                 | Descriptive, using an eidetic phenomenologic approach. Face-to-face and telephone interviews 4 and 15 weeks after the loss of the baby.                                                                                       | Parental experience of their baby's death                                                                                                                                               | 8 parents (5 mothers and 3 of their husbands)                                                                                                                | USA            | neonates              |
| 53 | Scott, L. D. (1998). "Perceived needs of parents of critically ill children."                                                             | Descriptive, comparative. Structured interview technique.                                                                                                                                                                     | Parental needs identified via the Critical Care Family Needs Inventory (a 45-item instrument developed to quantify the significance of perceived family needs- modified for pediatrics) | 21 carers (19 mothers, 1 grandmother, 1 aunt) and pediatric critical care nurses (n = 17).                                                                   | USA            | children/ adolescents |
| 54 | Kirschbaum, M. S. (1996). "Life support decisions for children: What do parents value?"                                                   | Phenomenological approach. An open-ended, non-schedule standardized interview format. Phenomenological analytic approach.                                                                                                     | Issues that factored into parents' decision-making in relation to withdrawing or withholding life sustaining treatment                                                                  | 20 families (two interviews conducted with both parents) families who had faced withdrawal/ withholding of treatment decision in the previous 6 to 12 months | USA            | children              |
| 55 | Pinch WJ, Winifred J, Spielman ML. (1996) "Ethics in the Neonatal Intensive Care Unit: Parental Perceptions at Four Years Postdischarge." | Multistage, exploratory descriptive study using a qualitative approach. In-depth interviews and the use of content analysis.                                                                                                  | Families' perceptions of moral conflict and ethical decision making related to their NICU experience                                                                                    | 23 families forming phase 3 of a longitudinal study                                                                                                          | USA            | neonates              |

|    | <b>Study</b>                                                                                                                     | <b>Design</b>                                                                                                                | <b>Key focus</b>                                                                                                                                                             | <b>Participants</b>                                                      | <b>Country</b> | <b>Patient group</b> |
|----|----------------------------------------------------------------------------------------------------------------------------------|------------------------------------------------------------------------------------------------------------------------------|------------------------------------------------------------------------------------------------------------------------------------------------------------------------------|--------------------------------------------------------------------------|----------------|----------------------|
| 56 | Pinch WJ, Spielman ML. (1993) "Parental perceptions of ethical issues post-NICU discharge. Western journal of nursing research." | Multistage, exploratory descriptive study using a qualitative approach. In-depth interviews and the use of content analysis. | Parental perceptions of ethical issues , including treatment decision making , 6 months after the infants' discharge from NICU                                               | 28 families (28 mothers, 19 fathers, 1 grandmother care giver)           | USA            | neonates             |
| 57 | Pinch WJ. (1990) "Looking back: Five families share their views of ethical decision making in the NICU."                         | Qualitative, phenomenological approach. Interviews using a modification of Lyon's semi-structured guide. Content analysis.   | Five families' descriptions of their experiences with neonates in the intensive care nursery provide a glimpse into their perceptions of ethical problems and moral actions. | Five families (2 husbands also participated)                             | USA            | neonates             |
| 58 | Pinch, W. J. and M. L. Spielman (1990). "The parents' perspective: ethical decision-making in neonatal intensive care."          | Qualitative, phenomenological approach. Semi-structured interviews using a moral conflict interview guide. Content analysis. | Parents' view of ethical decision-making responsibility                                                                                                                      | 32 families with critically ill babies in a neonatal intensive care unit | USA            | neonates             |
